# Supplementary material for: The effect of NiO on the conductivity of BaZr0.5Ce0.3Y0.2O3−δ based electrolytes
Source: Royal Society of Chemistry journal article supplement (doi:10.1039/c6ra09936j), 2016-01-01
Supplement: c6ra09936j1.pdf [file c6ra09936j1.pdf]

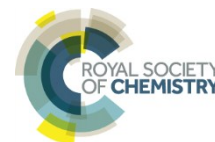

Journal Name

ARTICLE

## Electronic Supplementary Information

Received 00th January 20xx,  
Accepted 00th January 20xx

DOI: 10.1039/x0xx00000x

[www.rsc.org/](http://www.rsc.org/)

## The effect of NiO on the conductivity of BaZr<sub>0.5</sub>Ce<sub>0.3</sub>Y<sub>0.2</sub>O<sub>3-δ</sub> based electrolytes

Junfu Bu,<sup>\*a</sup> Pär Göran Jönsson<sup>a</sup> and Zhe Zhao<sup>\*ab</sup>

<sup>a</sup> Department of Materials Science and Engineering, KTH Royal Institute of Technology, SE-100 44 Stockholm, Sweden. Tel.: +4687908354, fax: +468207681. E-mail address: Dr. Junfu Bu, [junfu@kth.se](mailto:junfu@kth.se); Associate Professor Zhe Zhao, [zhezha@kth.se](mailto:zhezha@kth.se).

<sup>b</sup> Department of Materials Science and Engineering, Shanghai Institute of Technology, 201418, Shanghai, China.

**Table S1**

The detailed elemental content of sintered BZCY(Ni)532 ceramics, which were prepared at a temperature of 1600 °C. Note that all results are given in atomic%.

|                        | Spectrum         | In stats. | Ni    | Y    | Zr    | Ba    | Ce    | Total |
|------------------------|------------------|-----------|-------|------|-------|-------|-------|-------|
| <b>Grain (bulk)</b>    | Spectrum 1       | Yes       | 0.56  | 8.77 | 27.47 | 48.72 | 14.5  | 100   |
|                        | Spectrum 2       | Yes       | 0.33  | 8.53 | 27.91 | 48.58 | 14.68 | 100   |
|                        | Spectrum 3       | Yes       | 0.66  | 7.55 | 26.24 | 50.52 | 15.02 | 100   |
|                        | Spectrum 4       | Yes       | 0.49  | 8.47 | 28    | 48.24 | 14.99 | 100   |
|                        | Spectrum 5       | Yes       | 0.61  | 9.03 | 28.48 | 47.23 | 14.66 | 100   |
|                        | Spectrum 6       | Yes       | 0.35  | 7.82 | 28.53 | 50.41 | 12.9  | 100   |
|                        | Mean             |           |       | 0.5  | 8.36  | 27.77 | 48.96 | 14.46 |
| <b>Grain boundary</b>  | Line Spectrum 7  | Yes       | 0.55  | 8.04 | 28.66 | 48.76 | 13.99 | 100   |
|                        | Line Spectrum 8  | Yes       | 0.69  | 7.76 | 28.08 | 50.51 | 12.96 | 100   |
|                        | Line Spectrum 9  | Yes       | 0.59  | 8.75 | 27.13 | 49.36 | 14.16 | 100   |
|                        | Line Spectrum 10 | Yes       | 0.58  | 8.51 | 28.57 | 49    | 13.35 | 100   |
|                        | Line Spectrum 11 | Yes       | 0.65  | 8.41 | 28.52 | 48.37 | 14.04 | 100   |
|                        | Line Spectrum 12 | Yes       | 0.54  | 9.03 | 28.8  | 47.5  | 14.12 | 100   |
|                        | Line Spectrum 13 | Yes       | 0.4   | 8.92 | 28.27 | 48.37 | 14.04 | 100   |
|                        | Line Spectrum 14 | Yes       | 0.51  | 8.11 | 28.12 | 48.89 | 14.37 | 100   |
|                        | Line Spectrum 15 | Yes       | 0.73  | 9.06 | 29.46 | 48.4  | 12.35 | 100   |
|                        | Line Spectrum 16 | Yes       | 0.64  | 8.1  | 28.5  | 48.96 | 13.8  | 100   |
|                        | Line Spectrum 17 | Yes       | 0.61  | 7.9  | 28.37 | 50.8  | 12.32 | 100   |
|                        | Line Spectrum 18 | Yes       | 0.59  | 8.45 | 29.2  | 48.21 | 13.55 | 100   |
|                        | Line Spectrum 19 | Yes       | 0.83  | 9.06 | 29.94 | 46.51 | 13.66 | 100   |
|                        | Line Spectrum 20 | Yes       | 0.64  | 9.28 | 29.5  | 46.49 | 14.09 | 100   |
|                        | Line Spectrum 21 | Yes       | 0.21  | 8.96 | 29.03 | 47.96 | 13.84 | 100   |
|                        | Line Spectrum 22 | Yes       | 0.88  | 8.24 | 29.42 | 47.36 | 14.1  | 100   |
|                        | Line Spectrum 23 | Yes       | 0.55  | 8.2  | 29.4  | 47.84 | 14    | 100   |
|                        | Line Spectrum 24 | Yes       | 0.52  | 8.57 | 29.22 | 47.54 | 14.16 | 100   |
| Mean                   |                  |           | 0.595 | 8.52 | 28.79 | 48.38 | 13.72 | 100   |
| <b>Triangle region</b> | Spectrum 25      | Yes       | 0.67  | 8.33 | 28.54 | 48.43 | 14.03 | 100   |
| <b>Total</b>           | Mean             |           | 0.58  | 8.47 | 28.53 | 48.52 | 13.91 | 100   |

**Table S2**

The detailed elemental content of sintered BZCY532(Ni) ceramics, which were prepared at a temperature of 1600 °C. Note that all results are given in atomic%.

|                        | Spectrum         | In stats. | Ni   | Y     | Zr    | Ba    | Ce    | Total |
|------------------------|------------------|-----------|------|-------|-------|-------|-------|-------|
| <b>Grain (bulk)</b>    | Spectrum 1       | Yes       | 0.20 | 7.81  | 30.20 | 46.92 | 14.86 | 100   |
|                        | Spectrum 2       | Yes       | 0.20 | 7.83  | 31.49 | 46.08 | 14.40 | 100   |
|                        | Spectrum 3       | Yes       | 0.30 | 6.55  | 25.55 | 51.04 | 16.57 | 100   |
|                        | Spectrum 4       | Yes       | 0.16 | 7.32  | 27.69 | 49.87 | 14.96 | 100   |
|                        | Spectrum 5       | Yes       | 0.41 | 6.50  | 28.47 | 49.16 | 15.46 | 100   |
|                        | Spectrum 6       | Yes       | 0.38 | 6.90  | 28.18 | 49.05 | 15.48 | 100   |
|                        | Mean             |           |      | 0.275 | 7.15  | 28.60 | 48.69 | 15.29 |
| <b>Grain boundary</b>  | Line Spectrum 7  | Yes       | 0.29 | 7.72  | 28.36 | 49.12 | 14.50 | 100   |
|                        | Line Spectrum 8  | Yes       | 0.15 | 7.84  | 28.83 | 48.14 | 15.03 | 100   |
|                        | Line Spectrum 9  | Yes       | 0.10 | 7.18  | 28.86 | 48.62 | 15.23 | 100   |
|                        | Line Spectrum 10 | Yes       | 0.43 | 7.32  | 28.55 | 48.51 | 15.19 | 100   |
|                        | Line Spectrum 11 | Yes       | 0.50 | 7.64  | 26.47 | 50.28 | 15.11 | 100   |
|                        | Line Spectrum 12 | Yes       | 1.66 | 7.34  | 23.88 | 51.11 | 16.02 | 100   |
|                        | Line Spectrum 13 | Yes       | 0.05 | 6.37  | 26.50 | 50.51 | 16.67 | 100   |
|                        | Line Spectrum 14 | Yes       | 0.17 | 7.07  | 26.37 | 51.16 | 15.23 | 100   |
|                        | Line Spectrum 15 | Yes       | 0.50 | 7.54  | 27.09 | 51.20 | 14.67 | 100   |
|                        | Line Spectrum 16 | Yes       | 1.71 | 6.63  | 27.14 | 49.19 | 15.34 | 100   |
|                        | Line Spectrum 17 | Yes       | 1.31 | 6.86  | 27.17 | 48.92 | 15.74 | 100   |
|                        | Line Spectrum 18 | Yes       | 0.28 | 8.04  | 27.41 | 48.32 | 15.95 | 100   |
| <b>Triangle region</b> | Line Spectrum 19 | Yes       | 0.01 | 6.47  | 26.78 | 51.02 | 15.74 | 100   |
|                        | Line Spectrum 20 | Yes       | 0.27 | 5.63  | 27.94 | 50.13 | 16.03 | 100   |
|                        | Line Spectrum 21 | Yes       | 0.38 | 6.62  | 26.91 | 50.54 | 15.55 | 100   |
|                        | Line Spectrum 22 | Yes       | 0.62 | 6.40  | 26.91 | 50.62 | 15.49 | 100   |
|                        | Line Spectrum 23 | Yes       | 1.01 | 6.96  | 27.20 | 49.63 | 15.20 | 100   |
|                        | Line Spectrum 24 | Yes       | 0.78 | 6.92  | 25.89 | 51.09 | 15.33 | 100   |
|                        | Mean             |           |      | 0.57  | 7.03  | 27.13 | 49.90 | 15.45 |
| <b>Total</b>           | Mean             |           | 0.54 | 7.08  | 27.50 | 49.53 | 15.39 | 100   |
